# Supplementary material for: Molecular dynamics simulations indicate an induced-fit mechanism for LSD1/CoREST-H3-histone molecular recognition
Source: PubMed Central journal article supplement (PMC4175114; doi:10.1186/2046-1682-6-15), 2013-11-25
Supplement: 2046-1682-6-15-S1.pdf [file 2046-1682-6-15-S1.pdf]

Supporting Information

**Molecular Dynamics Simulations Indicate an Induced-Fit Mechanism for  
LSD1/CoREST-H3-Histone Molecular Recognition**

Nadeem A. Vellore and Riccardo Baron\*

Department of Medicinal Chemistry, College of Pharmacy, and The Henry Eyring Center for  
Theoretical Chemistry, The University of Utah, Salt Lake City, UT 84112-5820, U.S.A.

\*Corresponding author: Phone: +1-801-585-7117; Email: [r.baron@utah.edu](mailto:r.baron@utah.edu)

**Figure-S1:** Root-mean-square fluctuation (RMSF) of the H3-binding site. Only the C<sup>α</sup> atoms of the H3-binding site were used for RMSF calculation. The RMSF for regions of the binding site are shaded as yellow, white and blue for residues 353-363, 370-391 and 529-564 respectively.

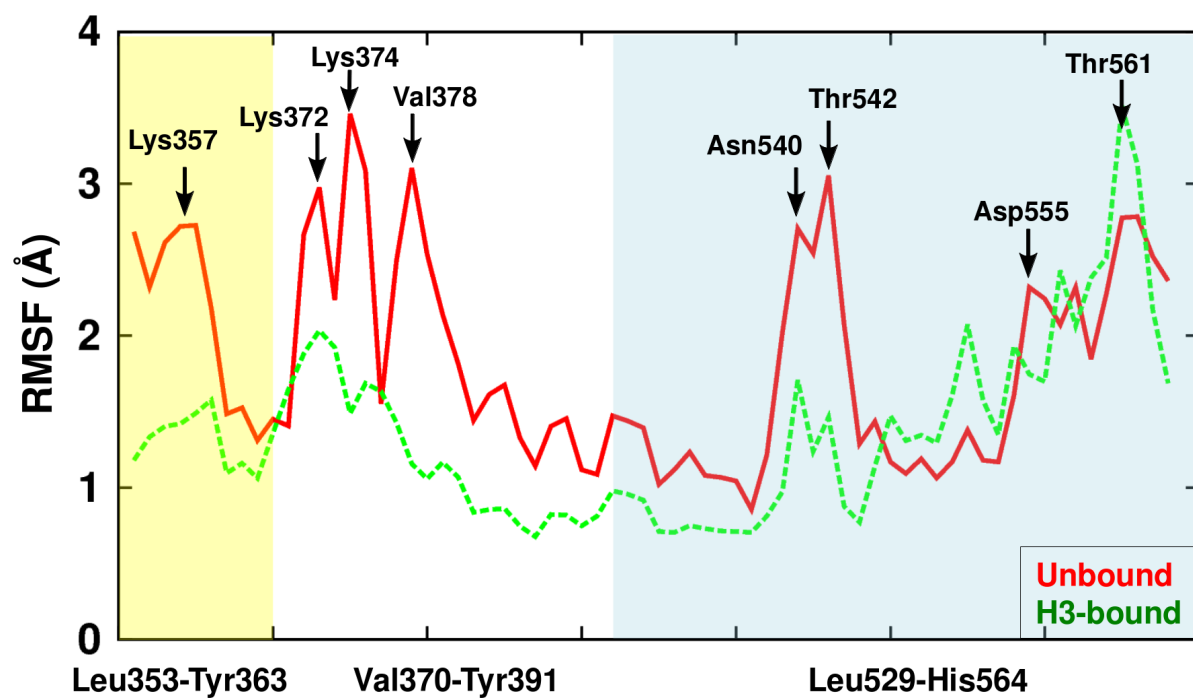

**Table-S1:** PCA rank for the three-selection scheme considered and corresponding relative contributions.

| PC rank | Whole                              | AO domain | H3-binding site |
|---------|------------------------------------|-----------|-----------------|
|         | Percentage population (cumulative) |           |                 |
| 1       | 37 (37)                            | 55 (55)   | 71 (71)         |
| 2       | 31 (67)                            | 16 (71)   | 9 (80)          |
| 3       | 19 (86)                            | 13 (84)   | 7 (87)          |
| 4       | 5 (91)                             | 5 (89)    | 3 (90)          |
| 5       | 4 (95)                             | 4 (93)    | 2 (92)          |
